# Supplementary material
Source: PubMed Central journal article supplement (PMC4254295)
Supplement: NIHMS607544-supplement-02.pdf [file NIHMS607544-supplement-02.pdf]

**Table 4: Univariate analysis for association of baseline ocular and fundus characteristics with outer retinal tubulation (ORT) in any area at Week 104 (N=368)**

| Ocular Characteristics                    | N   | ORT, n (%) | P Value* | OR (95% CI)      | P Value†     |
|-------------------------------------------|-----|------------|----------|------------------|--------------|
| <b>Intraocular pressure (mmHg)</b>        |     |            |          |                  |              |
| <10                                       | 8   | 2(25.0%)   | 0.50     | 1.00             | 0.55         |
| 10-20                                     | 339 | 60(17.7%)  |          | 0.65(0.13,3.27)  |              |
| >20                                       | 21  | 2(9.5%)    |          | 0.32(0.04,2.75)  |              |
| <b>Glaucoma</b>                           |     |            |          |                  |              |
| No                                        | 322 | 59(18.3%)  | 0.30     | 1.00             | 0.22         |
| Yes                                       | 46  | 5(10.9%)   |          | 0.54(0.21,1.43)  |              |
| <b>Blocked fluorescence lesion</b>        |     |            |          |                  |              |
| No                                        | 318 | 50(15.7%)  | 0.06     | 1.00             | <b>0.047</b> |
| Yes                                       | 47  | 13(27.7%)  |          | 2.05(1.01,4.16)  |              |
| <b>Fibrotic or non-fibrotic scar</b>      |     |            |          |                  |              |
| No                                        | 356 | 59(16.6%)  | 0.052    | 1.00             | <b>0.042</b> |
| Yes                                       | 9   | 4(44.4%)   |          | 4.03(1.05,15.44) |              |
| <b>Location of lesion</b>                 |     |            |          |                  |              |
| Not subfoveal                             | 92  | 11(12.0%)  | 0.15     | 1.00             | 0.12         |
| Subfoveal                                 | 272 | 52(19.1%)  |          | 1.74(0.87,3.50)  |              |
| <b>Lesion type</b>                        |     |            |          |                  |              |
| Predominantly or Minimally classic        | 138 | 31(22.5%)  | 0.06     | 1.00             | <b>0.048</b> |
| Occult only                               | 224 | 32(14.3%)  |          | 0.58(0.33,0.99)  |              |
| <b>Lesion composition</b>                 |     |            |          |                  |              |
| CNV only                                  | 187 | 19(10.2%)  | 0.003    | 1.00             | <b>0.006</b> |
| CNV and hemorrhage                        | 107 | 24(22.4%)  |          | 2.56(1.33,4.93)  |              |
| CNV and blocked fluorescence              | 23  | 7(30.4%)   |          | 3.87(1.41,10.6)  |              |
| CNV and SPED                              | 11  | 2(18.2%)   |          | 1.96(0.40,9.77)  |              |
| CNV and others                            | 37  | 11(29.7%)  |          | 3.74(1.60,8.75)  |              |
| <b>RAP lesion</b>                         |     |            |          |                  |              |
| No                                        | 337 | 60(17.8%)  | 0.59     | 1.00             | 0.42         |
| Yes                                       | 26  | 3(11.5%)   |          | 0.60(0.18,2.07)  |              |
| <b>Baseline foveal center involvement</b> |     |            |          |                  |              |
| CNV                                       | 219 | 44(20.1%)  | 0.29     | 1.00             | 0.42         |
| Fluid                                     | 91  | 10(11.0%)  |          | 0.49(0.24,1.02)  |              |
| Hemorrhage                                | 45  | 7(15.6%)   |          | 0.73(0.31,1.75)  |              |
| SPED                                      | 4   | 1(25.0%)   |          | 1.33(0.13,13.05) |              |
| Other                                     | 6   | 1(16.7%)   |          | 0.80(0.09,6.98)  |              |

|                                                |     |           |        |                  |               |
|------------------------------------------------|-----|-----------|--------|------------------|---------------|
| <b>Hemorrhage contiguous with lesion</b>       |     |           |        |                  |               |
| No                                             | 224 | 29(12.9%) | 0.007  | 1.00             | <b>0.007</b>  |
| Yes                                            | 141 | 34(24.1%) |        | 2.14(1.23,3.70)  |               |
| <b>SPED (proportion of total lesion)</b>       |     |           |        |                  |               |
| None                                           | 348 | 60(17.2%) | 1.00   | 1.00             | 0.99          |
| <50%                                           | 5   | 1(20.0%)  |        | 1.20(0.13,10.93) |               |
| >=50%                                          | 12  | 2(16.7%)  |        | 0.96(0.21,4.49)  |               |
| <b>Hemorrhage (associated with the lesion)</b> |     |           |        |                  |               |
| None                                           | 145 | 22(15.2%) | 0.004  | 1.00             | <b>0.004</b>  |
| <=1 DA                                         | 169 | 23(13.6%) |        | 0.88(0.47,1.66)  |               |
| <=2 DA                                         | 22  | 8(36.4%)  |        | 3.19(1.20,8.51)  |               |
| >2 DA                                          | 28  | 10(35.7%) |        | 3.11(1.27,7.61)  |               |
| <b>Geographic atrophy in the study eye</b>     |     |           |        |                  |               |
| None/questionable                              | 343 | 53(15.5%) | 0.001  | 1.00             | <b>0.0007</b> |
| Present                                        | 25  | 11(44.0%) |        | 4.30(1.85,9.98)  |               |
| <b>CNV in the fellow eye</b>                   |     |           |        |                  |               |
| None/questionable                              | 244 | 45(18.4%) | 0.55   | 1.00             | 0.47          |
| Present                                        | 117 | 18(15.4%) |        | 0.80(0.44,1.46)  |               |
| <b>Baseline area of CNV (DA)</b>               |     |           |        |                  |               |
| <=1                                            | 148 | 19(12.8%) | 0.15   | 1.00             | 0.16          |
| >1 to <=2                                      | 73  | 13(17.8%) |        | 1.47(0.68,3.17)  |               |
| >2 to <=4                                      | 70  | 12(17.1%) |        | 1.40(0.64,3.08)  |               |
| >4                                             | 33  | 10(30.3%) |        | 2.95(1.22,7.15)  |               |
| Missing                                        | 44  | 10(22.7%) |        | 2.00(0.85,4.69)  |               |
| <b>Baseline total area of CNV lesion (DA)</b>  |     |           |        |                  |               |
| <=1                                            | 121 | 12(9.9%)  | 0.016  | 1.00             | <b>0.02</b>   |
| >1 to <=2                                      | 80  | 14(17.5%) |        | 1.93(0.84,4.42)  |               |
| >2 to <=4                                      | 84  | 17(20.2%) |        | 2.30(1.04,5.12)  |               |
| >4                                             | 69  | 19(27.5%) |        | 3.45(1.56,7.65)  |               |
| <b>Baseline VA in the study eye</b>            |     |           |        |                  |               |
| 20/25-40                                       | 140 | 13(9.3%)  | 0.0001 | 1.00             | <b>0.0001</b> |
| 20/50-80                                       | 136 | 21(15.4%) |        | 1.78(0.85,3.72)  |               |
| 20/100-160                                     | 70  | 21(30.0%) |        | 4.19(1.95,9.01)  |               |
| 20/200-320                                     | 22  | 9(40.9%)  |        | 6.76(2.43,18.8)  |               |
| <b>Baseline VA in the fellow eye</b>           |     |           |        |                  |               |
| 20/20 or better                                | 117 | 21(17.9%) | 0.18   | 1.00             | 0.18          |
| 20/25-20/40                                    | 137 | 29(21.2%) |        | 1.23(0.66,2.29)  |               |
| 20/50 or worse                                 | 114 | 14(12.3%) |        | 0.64(0.31,1.33)  |               |

\* From Fisher exact test.

†From logistic regression model.

“The Other” category included pigment, drusen, and non-leaking CNV.

VA=visual acuity; SPED=subretinal pigment epithelial detachment; DA=disc area; CNV= choroidal neovascularization; RAP= retinal angiomatous proliferation.
