# Supplementary material
Source: PubMed Central journal article supplement (PMC4254295)
Supplement: NIHMS607544-supplement-03.pdf [file NIHMS607544-supplement-03.pdf]

**Table 5: Univariate analysis for association of baseline OCT features with ORT in any area at Week 104 (N=368)**

| OCT features                                                              | N   | ORT (%)   | P Value* | OR (95% CI)     | P Value†     |
|---------------------------------------------------------------------------|-----|-----------|----------|-----------------|--------------|
| <b>Subretinal thickness at foveal center (microns)</b>                    |     |           |          |                 |              |
| =0                                                                        | 231 | 42(18.2%) | 0.57     | 1.00            | 0.59         |
| >0 to <=25                                                                | 35  | 7(20.0%)  |          | 1.13(0.46,2.75) |              |
| >25                                                                       | 100 | 14(14.0%) |          | 0.73(0.38,1.41) |              |
| <b>Retinal thickness at foveal center (microns)</b>                       |     |           |          |                 |              |
| <120                                                                      | 34  | 4(11.8%)  | 0.07     | 1.00            | 0.06         |
| 120 to 212                                                                | 200 | 28(14.0%) |          | 1.22(0.40,3.73) |              |
| >212                                                                      | 132 | 31(23.5%) |          | 2.30(0.75,7.04) |              |
| <b>Subretinal tissue complex thickness in the foveal center (microns)</b> |     |           |          |                 |              |
| >0 to <=75                                                                | 89  | 6(6.7%)   | 0.002    | 1.00            | <b>0.004</b> |
| >75 to <=160                                                              | 92  | 19(20.7%) |          | 3.60(1.36,9.50) |              |
| >160 to <=275                                                             | 88  | 12(13.6%) |          | 2.18(0.78,6.11) |              |
| >275                                                                      | 97  | 26(26.8%) |          | 5.07(1.97,13.0) |              |
| <b>Subretinal fluid</b>                                                   |     |           |          |                 |              |
| No fluid                                                                  | 57  | 8(14.0%)  | 0.29     | 1.00            | 0.28         |
| Fluid not in fovea center                                                 | 166 | 35(21.1%) |          | 1.64(0.71,3.77) |              |
| Fluid in fovea center                                                     | 141 | 21(14.9%) |          | 1.07(0.44,2.58) |              |
| <b>Intraretinal fluid</b>                                                 |     |           |          |                 |              |
| No fluid                                                                  | 97  | 7(7.2%)   | 0.003    | 1.00            | <b>0.01</b>  |
| Fluid not in fovea center                                                 | 108 | 23(21.3%) |          | 3.48(1.42,8.52) |              |
| Fluid in fovea center                                                     | 155 | 34(21.9%) |          | 3.61(1.53,8.52) |              |
| <b>Sub-RPE fluid</b>                                                      |     |           |          |                 |              |
| No fluid                                                                  | 146 | 24(16.4%) | 0.18     | 1.00            | 0.17         |
| Fluid not in fovea center                                                 | 66  | 16(24.2%) |          | 1.63(0.80,3.32) |              |
| Fluid in fovea center                                                     | 126 | 17(13.5%) |          | 0.79(0.40,1.55) |              |
| <b>RPE elevation</b>                                                      |     |           |          |                 |              |
| No                                                                        | 46  | 6(13.0%)  | 0.53     | 1.00            | 0.41         |
| Yes                                                                       | 317 | 57(18.0%) |          | 1.46(0.59,3.61) |              |
| <b>Subretinal hyper-reflective material (SHRM)</b>                        |     |           |          |                 |              |
| No                                                                        | 90  | 8(8.9%)   | 0.011    | 1.00            | <b>0.01</b>  |
| Yes                                                                       | 271 | 56(20.7%) |          | 2.67(1.22,5.84) |              |
| <b>SHRM at center 1 mm</b>                                                |     |           |          |                 |              |
| No                                                                        | 117 | 10(8.5%)  | 0.002    | 1.00            | <b>0.003</b> |
| Yes                                                                       | 241 | 52(21.6%) |          | 2.94(1.44,6.03) |              |

\* From Fisher exact test.

†From logistic regression model.

ORT=outer retinal tubulation; RPE=retinal pigment epithelium.
