# Supplementary material
Source: PubMed Central journal article supplement (PMC4254295)
Supplement: NIHMS607544-supplement-04.pdf [file NIHMS607544-supplement-04.pdf]

**Table 9: Comparison of patients who had SD-OCT and those with TD-OCT at 2 years (N=1023)**

|                                                          | <b>Patients with SD-OCT for ORT evaluation (n=384)</b> | <b>Patients with TD-OCT only (n=639)</b> | <b>P value*</b> |
|----------------------------------------------------------|--------------------------------------------------------|------------------------------------------|-----------------|
| <b>Baseline Characteristics</b>                          |                                                        |                                          |                 |
| Age, Mean (SE)                                           | 78.6 (0.39)                                            | 79.0 (0.30)                              | 0.40            |
| VA in Study eye, Mean (SE)                               | 61.4 (0.68)                                            | 60.8 (0.53)                              | 0.45            |
| total lesion size, Mean (SE)                             | 2.5 (0.13)                                             | 2.4 (0.10)                               | 0.61            |
| GA in Study eye, n(%)                                    | 30 (7.8%)                                              | 39 (6.1%)                                | 0.31            |
| Diabetes, n(%)                                           | 67 (17.4%)                                             | 108 (16.9%)                              | 0.86            |
| blocked fluorescence (Lesion component) , n(%)           | 49 (12.8%)                                             | 93 (14.6%)                               | 0.46            |
| SHRM, n(%)                                               | 281 (74.5%)                                            | 492 (77.7%)                              | 0.25            |
| <b>2-Year Outcomes</b>                                   |                                                        |                                          |                 |
| VA in Study eye, Mean (SE)                               | 67.2 (0.93)                                            | 67.7 (0.72)                              | 0.65            |
| Total lesion size, Mean (SE)                             | 3.3 (0.16)                                             | 3.2 (0.13)                               | 0.61            |
| GA in study eye, n(%)                                    | 77 (20.1%)                                             | 139 (22.2%)                              | 0.48            |
| blocked fluorescence (pathology in foveal center) , n(%) | 9 (2.3%)                                               | 18 (2.8%)                                | 0.69            |
| SHRM, n(%)                                               | 175 (45.8%)                                            | 293 (47.0%)                              | 0.74            |

\*P values are two group ttest for comparison of means, from Fisher's exact test for comparison of proportions.
